# Supplementary material
Source: MDPI journal article supplement (https://www.mdpi.com/2571-550X/6/1/12)
Supplement: s1 [file s1]

**Supplementary Materials**

**S4 – Dendrochronological Data**

**S4.1 - Mean ring-width records (samples Wem01 – Wem14)**

**100 = 1mm**

Title : Wem01M

Raw Ring-width PISY data of 198 years length

Average ring width 75.20      Sensitivity 0.39

|     |     |     |     |     |     |     |     |     |     |
|-----|-----|-----|-----|-----|-----|-----|-----|-----|-----|
| 49  | 40  | 57  | 14  | 26  | 12  | 7   | 12  | 19  | 22  |
| 27  | 23  | 20  | 48  | 39  | 24  | 19  | 11  | 8   | 11  |
| 12  | 16  | 20  | 21  | 28  | 30  | 14  | 28  | 21  | 20  |
| 20  | 21  | 17  | 24  | 41  | 27  | 19  | 25  | 20  | 14  |
| 5   | 19  | 10  | 19  | 18  | 43  | 38  | 48  | 27  | 22  |
| 34  | 77  | 46  | 77  | 41  | 34  | 58  | 75  | 36  | 45  |
| 38  | 58  | 42  | 45  | 22  | 13  | 37  | 44  | 97  | 138 |
| 78  | 83  | 106 | 129 | 84  | 56  | 38  | 76  | 40  | 41  |
| 37  | 34  | 106 | 74  | 37  | 56  | 96  | 126 | 103 | 149 |
| 152 | 73  | 71  | 104 | 163 | 113 | 81  | 46  | 60  | 75  |
| 38  | 19  | 36  | 87  | 112 | 56  | 70  | 21  | 57  | 56  |
| 109 | 97  | 157 | 135 | 32  | 13  | 13  | 16  | 30  | 20  |
| 12  | 17  | 15  | 29  | 42  | 36  | 98  | 82  | 30  | 46  |
| 62  | 80  | 161 | 144 | 70  | 31  | 95  | 123 | 81  | 100 |
| 97  | 154 | 187 | 105 | 109 | 75  | 31  | 43  | 64  | 63  |
| 61  | 123 | 110 | 80  | 47  | 97  | 107 | 37  | 58  | 101 |
| 133 | 146 | 146 | 212 | 186 | 126 | 70  | 75  | 51  | 56  |
| 57  | 88  | 123 | 245 | 170 | 54  | 211 | 157 | 320 | 217 |
| 253 | 193 | 178 | 121 | 178 | 254 | 316 | 243 | 170 | 141 |
| 202 | 138 | 128 | 126 | 98  | 107 | 104 | 101 |     |     |

Title : Wem02M

Raw Ring-width PISY data of 49 years length

Average ring width 174.96      Sensitivity 0.20

|     |     |     |     |     |     |     |     |     |     |
|-----|-----|-----|-----|-----|-----|-----|-----|-----|-----|
| 97  | 175 | 271 | 277 | 242 | 239 | 232 | 142 | 138 | 114 |
| 112 | 152 | 148 | 169 | 195 | 112 | 144 | 187 | 145 | 196 |
| 221 | 205 | 213 | 176 | 197 | 194 | 219 | 175 | 229 | 265 |
| 278 | 211 | 202 | 116 | 138 | 180 | 206 | 191 | 135 | 109 |
| 100 | 158 | 184 | 197 | 100 | 165 | 112 | 108 | 102 |     |

Title : Wem03M

Raw Ring-width PISY data of 78 years length

Average ring width 129.22      Sensitivity 0.32

|     |     |     |     |     |     |     |     |     |     |
|-----|-----|-----|-----|-----|-----|-----|-----|-----|-----|
| 261 | 384 | 357 | 560 | 418 | 244 | 210 | 244 | 404 | 213 |
| 394 | 293 | 294 | 253 | 253 | 149 | 148 | 112 | 59  | 110 |
| 201 | 250 | 134 | 89  | 129 | 134 | 59  | 61  | 84  | 125 |
| 147 | 206 | 173 | 153 | 159 | 156 | 191 | 133 | 90  | 61  |
| 35  | 15  | 16  | 16  | 28  | 81  | 72  | 120 | 76  | 30  |
| 11  | 11  | 11  | 20  | 9   | 16  | 8   | 16  | 16  | 14  |
| 19  | 33  | 32  | 45  | 44  | 60  | 63  | 88  | 90  | 127 |
| 68  | 77  | 81  | 92  | 102 | 124 | 122 | 96  |     |     |

Title : Wem04M

Raw Ring-width PISY data of 87 years length

Average ring width 113.40      Sensitivity 0.42

|     |     |     |     |     |     |     |     |     |     |
|-----|-----|-----|-----|-----|-----|-----|-----|-----|-----|
| 85  | 210 | 279 | 234 | 362 | 514 | 422 | 201 | 214 | 365 |
| 517 | 233 | 283 | 172 | 260 | 117 | 72  | 35  | 32  | 94  |
| 46  | 146 | 209 | 167 | 93  | 122 | 133 | 112 | 76  | 67  |
| 84  | 155 | 187 | 202 | 143 | 140 | 125 | 141 | 190 | 63  |
| 38  | 52  | 44  | 33  | 22  | 21  | 31  | 74  | 44  | 73  |
| 65  | 14  | 26  | 14  | 21  | 42  | 23  | 46  | 26  | 20  |
| 36  | 68  | 13  | 35  | 48  | 33  | 40  | 65  | 78  | 77  |
| 116 | 85  | 82  | 39  | 44  | 56  | 48  | 17  | 92  | 153 |
| 82  | 72  | 77  | 88  | 102 | 82  | 107 |     |     |     |

Title : Wem05M

Raw Ring-width PISY data of 184 years length

Average ring width 80.77      Sensitivity 0.43

|     |     |     |     |     |     |     |     |     |     |
|-----|-----|-----|-----|-----|-----|-----|-----|-----|-----|
| 21  | 31  | 25  | 21  | 27  | 36  | 29  | 61  | 60  | 92  |
| 25  | 39  | 36  | 51  | 62  | 52  | 79  | 83  | 81  | 28  |
| 134 | 70  | 41  | 36  | 53  | 104 | 77  | 18  | 15  | 21  |
| 49  | 86  | 13  | 19  | 29  | 51  | 47  | 31  | 45  | 67  |
| 77  | 57  | 27  | 29  | 84  | 60  | 44  | 70  | 102 | 63  |
| 37  | 57  | 101 | 105 | 82  | 135 | 172 | 134 | 87  | 36  |
| 56  | 58  | 177 | 120 | 152 | 90  | 64  | 112 | 188 | 160 |
| 155 | 166 | 169 | 113 | 207 | 115 | 33  | 44  | 48  | 112 |
| 300 | 167 | 150 | 190 | 212 | 119 | 48  | 69  | 170 | 137 |
| 83  | 44  | 95  | 262 | 119 | 112 | 131 | 141 | 152 | 152 |
| 112 | 199 | 121 | 41  | 30  | 52  | 38  | 16  | 22  | 9   |
| 14  | 13  | 12  | 19  | 9   | 14  | 12  | 10  | 14  | 16  |
| 6   | 10  | 7   | 8   | 9   | 6   | 7   | 9   | 12  | 14  |
| 14  | 20  | 22  | 69  | 105 | 58  | 20  | 75  | 69  | 20  |
| 8   | 9   | 22  | 41  | 50  | 28  | 57  | 8   | 10  | 14  |
| 16  | 22  | 32  | 35  | 49  | 28  | 84  | 94  | 26  | 66  |
| 169 | 192 | 215 | 308 | 353 | 205 | 127 | 141 | 94  | 44  |
| 47  | 62  | 121 | 79  | 77  | 78  | 124 | 419 | 474 | 396 |
| 155 | 97  | 87  | 70  |     |     |     |     |     |     |

Title : Wem06M

Raw Ring-width PISY data of 134 years length

Average ring width 95.34      Sensitivity 0.27

|     |     |     |     |     |     |     |     |     |     |
|-----|-----|-----|-----|-----|-----|-----|-----|-----|-----|
| 53  | 127 | 166 | 159 | 176 | 178 | 35  | 126 | 167 | 158 |
| 115 | 144 | 103 | 239 | 186 | 125 | 92  | 137 | 169 | 143 |
| 121 | 128 | 103 | 104 | 169 | 106 | 96  | 53  | 57  | 98  |
| 137 | 112 | 111 | 82  | 129 | 91  | 129 | 70  | 69  | 86  |
| 85  | 97  | 108 | 93  | 108 | 122 | 116 | 74  | 72  | 88  |
| 107 | 86  | 94  | 99  | 112 | 203 | 117 | 110 | 173 | 157 |
| 110 | 118 | 135 | 183 | 155 | 116 | 113 | 123 | 74  | 62  |
| 74  | 97  | 98  | 78  | 53  | 70  | 80  | 95  | 89  | 96  |

|    |    |     |     |     |     |    |     |    |    |
|----|----|-----|-----|-----|-----|----|-----|----|----|
| 72 | 97 | 95  | 132 | 114 | 122 | 80 | 47  | 45 | 64 |
| 62 | 78 | 59  | 61  | 35  | 28  | 43 | 68  | 73 | 85 |
| 74 | 82 | 119 | 82  | 86  | 136 | 64 | 61  | 44 | 84 |
| 73 | 43 | 84  | 66  | 71  | 105 | 95 | 118 | 62 | 37 |
| 54 | 56 | 62  | 59  | 51  | 30  | 28 | 18  | 36 | 59 |
| 39 | 56 | 52  | 40  |     |     |    |     |    |    |

Title : Wem07M

Raw Ring-width PISY data of 124 years length

Average ring width 92.72      Sensitivity 0.37

|     |     |     |     |     |     |     |     |     |     |
|-----|-----|-----|-----|-----|-----|-----|-----|-----|-----|
| 66  | 91  | 108 | 112 | 116 | 105 | 75  | 134 | 145 | 190 |
| 135 | 106 | 233 | 182 | 194 | 136 | 66  | 123 | 164 | 97  |
| 122 | 190 | 192 | 212 | 150 | 151 | 174 | 82  | 53  | 82  |
| 120 | 122 | 59  | 45  | 39  | 43  | 59  | 53  | 61  | 28  |
| 37  | 90  | 150 | 137 | 133 | 126 | 104 | 90  | 78  | 52  |
| 23  | 35  | 30  | 76  | 177 | 99  | 83  | 118 | 144 | 94  |
| 29  | 45  | 47  | 70  | 74  | 55  | 63  | 175 | 89  | 93  |
| 174 | 195 | 131 | 93  | 127 | 145 | 82  | 39  | 86  | 140 |
| 73  | 63  | 65  | 116 | 90  | 40  | 25  | 54  | 108 | 148 |
| 114 | 206 | 57  | 107 | 68  | 51  | 49  | 83  | 52  | 23  |
| 21  | 29  | 23  | 50  | 49  | 34  | 22  | 14  | 37  | 47  |
| 36  | 54  | 54  | 100 | 97  | 72  | 95  | 175 | 135 | 69  |
| 33  | 76  | 83  | 57  |     |     |     |     |     |     |

Title : Wem08M

Raw Ring-width PISY data of 102 years length

Average ring width 137.16      Sensitivity 0.26

|     |     |     |     |     |     |     |     |     |     |
|-----|-----|-----|-----|-----|-----|-----|-----|-----|-----|
| 297 | 300 | 174 | 146 | 197 | 129 | 332 | 525 | 432 | 441 |
| 194 | 149 | 146 | 146 | 213 | 144 | 232 | 283 | 219 | 159 |
| 173 | 148 | 147 | 114 | 106 | 149 | 202 | 238 | 210 | 189 |
| 150 | 153 | 134 | 163 | 88  | 90  | 69  | 53  | 46  | 51  |
| 37  | 66  | 147 | 134 | 134 | 121 | 85  | 26  | 13  | 16  |
| 35  | 30  | 48  | 49  | 37  | 21  | 46  | 36  | 47  | 83  |
| 88  | 99  | 137 | 129 | 126 | 157 | 159 | 147 | 85  | 88  |
| 107 | 85  | 137 | 170 | 159 | 121 | 155 | 140 | 171 | 196 |

|     |     |     |     |     |     |     |     |     |     |
|-----|-----|-----|-----|-----|-----|-----|-----|-----|-----|
| 137 | 221 | 225 | 198 | 111 | 94  | 82  | 105 | 75  | 78  |
| 79  | 115 | 94  | 76  | 73  | 154 | 131 | 139 | 128 | 118 |
| 70  | 89  |     |     |     |     |     |     |     |     |

Title : Wem09M

Raw Ring-width PISY data of 76 years length

Average ring width 173.58      Sensitivity 0.34

|     |     |     |     |     |     |     |     |     |     |
|-----|-----|-----|-----|-----|-----|-----|-----|-----|-----|
| 157 | 353 | 496 | 564 | 535 | 540 | 377 | 415 | 525 | 411 |
| 234 | 182 | 228 | 348 | 182 | 292 | 150 | 256 | 195 | 121 |
| 112 | 87  | 137 | 107 | 172 | 316 | 214 | 125 | 125 | 189 |
| 188 | 98  | 92  | 94  | 163 | 145 | 163 | 176 | 170 | 211 |
| 178 | 251 | 108 | 48  | 40  | 22  | 17  | 20  | 30  | 84  |
| 140 | 114 | 83  | 85  | 39  | 16  | 8   | 14  | 19  | 20  |
| 20  | 15  | 14  | 43  | 67  | 40  | 86  | 201 | 180 | 150 |
| 178 | 219 | 235 | 296 | 250 | 217 |     |     |     |     |

Title : Wem10

Raw Ring-width PISY data of 115 years length

Average ring width 103.50      Sensitivity 0.26

|     |     |     |     |     |     |     |     |     |     |
|-----|-----|-----|-----|-----|-----|-----|-----|-----|-----|
| 202 | 334 | 332 | 306 | 292 | 314 | 196 | 267 | 384 | 308 |
| 125 | 66  | 133 | 220 | 144 | 187 | 161 | 144 | 115 | 113 |
| 73  | 53  | 72  | 63  | 59  | 60  | 135 | 80  | 78  | 85  |
| 69  | 49  | 53  | 45  | 64  | 60  | 71  | 60  | 59  | 71  |
| 64  | 58  | 30  | 24  | 14  | 21  | 16  | 17  | 14  | 27  |
| 56  | 47  | 74  | 67  | 52  | 19  | 10  | 11  | 20  | 26  |
| 73  | 62  | 30  | 27  | 40  | 36  | 39  | 60  | 60  | 76  |
| 99  | 62  | 97  | 164 | 182 | 222 | 72  | 77  | 71  | 96  |
| 169 | 195 | 210 | 195 | 152 | 120 | 161 | 177 | 165 | 176 |
| 201 | 170 | 107 | 82  | 96  | 92  | 92  | 70  | 72  | 85  |
| 65  | 60  | 47  | 81  | 67  | 87  | 98  | 83  | 62  | 62  |
| 64  | 84  | 83  | 81  | 77  |     |     |     |     |     |

Title : Wem11M

Raw Ring-width PISY data of 269 years length

Average ring width 59.03      Sensitivity 0.31

|     |     |     |     |     |     |     |     |     |     |
|-----|-----|-----|-----|-----|-----|-----|-----|-----|-----|
| 76  | 114 | 155 | 141 | 115 | 91  | 88  | 104 | 88  | 109 |
| 85  | 147 | 101 | 49  | 41  | 71  | 50  | 34  | 71  | 51  |
| 49  | 34  | 34  | 23  | 33  | 82  | 56  | 18  | 15  | 25  |
| 44  | 73  | 44  | 43  | 52  | 67  | 40  | 46  | 16  | 26  |
| 14  | 12  | 23  | 16  | 20  | 48  | 48  | 52  | 84  | 65  |
| 110 | 159 | 113 | 129 | 86  | 46  | 81  | 112 | 97  | 74  |
| 88  | 78  | 62  | 86  | 110 | 77  | 55  | 61  | 60  | 60  |
| 54  | 44  | 48  | 47  | 71  | 40  | 36  | 109 | 81  | 56  |
| 67  | 57  | 53  | 54  | 48  | 23  | 23  | 65  | 43  | 52  |
| 49  | 41  | 83  | 23  | 19  | 19  | 21  | 21  | 21  | 44  |
| 21  | 22  | 30  | 25  | 28  | 42  | 54  | 39  | 48  | 39  |
| 41  | 98  | 108 | 90  | 110 | 89  | 36  | 60  | 116 | 55  |
| 52  | 102 | 53  | 56  | 67  | 51  | 28  | 14  | 12  | 17  |
| 17  | 21  | 23  | 55  | 53  | 43  | 24  | 62  | 51  | 72  |
| 78  | 124 | 137 | 217 | 181 | 104 | 67  | 51  | 52  | 55  |
| 62  | 79  | 86  | 100 | 112 | 80  | 148 | 87  | 87  | 45  |
| 61  | 123 | 117 | 219 | 204 | 114 | 108 | 134 | 82  | 138 |
| 97  | 58  | 98  | 132 | 236 | 212 | 226 | 193 | 126 | 115 |
| 120 | 159 | 101 | 91  | 68  | 73  | 24  | 25  | 29  | 26  |
| 21  | 21  | 21  | 27  | 27  | 24  | 32  | 33  | 39  | 71  |
| 58  | 32  | 20  | 19  | 22  | 18  | 14  | 35  | 19  | 19  |
| 25  | 40  | 38  | 26  | 14  | 26  | 32  | 20  | 20  | 24  |
| 20  | 18  | 15  | 18  | 23  | 20  | 12  | 9   | 14  | 19  |
| 13  | 11  | 10  | 11  | 16  | 16  | 22  | 25  | 12  | 25  |
| 37  | 31  | 22  | 30  | 36  | 24  | 28  | 35  | 34  | 40  |
| 33  | 64  | 126 | 82  | 81  | 59  | 94  | 47  | 14  | 18  |
| 29  | 18  | 15  | 14  | 12  | 15  | 13  | 19  | 20  |     |

Title : Wem12M

Raw Ring-width PISY data of 121 years length

Average ring width 141.03      Sensitivity 0.36

|    |    |    |    |     |     |     |    |    |   |
|----|----|----|----|-----|-----|-----|----|----|---|
| 99 | 90 | 62 | 44 | 122 | 190 | 133 | 72 | 96 | 9 |
|----|----|----|----|-----|-----|-----|----|----|---|

|     |     |     |     |     |     |     |     |     |     |
|-----|-----|-----|-----|-----|-----|-----|-----|-----|-----|
| 223 | 221 | 137 | 118 | 110 | 127 | 193 | 197 | 205 | 194 |
| 89  | 87  | 90  | 63  | 99  | 63  | 89  | 127 | 133 | 113 |
| 115 | 112 | 119 | 83  | 101 | 112 | 69  | 122 | 85  | 96  |
| 104 | 68  | 80  | 31  | 86  | 61  | 63  | 27  | 36  | 29  |
| 17  | 18  | 60  | 81  | 127 | 132 | 74  | 89  | 91  | 151 |
| 196 | 289 | 227 | 126 | 56  | 33  | 21  | 33  | 181 | 253 |
| 305 | 197 | 197 | 147 | 180 | 137 | 147 | 228 | 369 | 213 |
| 260 | 259 | 236 | 227 | 316 | 277 | 227 | 120 | 129 | 125 |
| 78  | 62  | 131 | 99  | 79  | 50  | 80  | 205 | 184 | 270 |
| 492 | 204 | 168 | 191 | 205 | 175 | 156 | 172 | 217 | 166 |
| 272 | 404 | 263 | 307 | 268 | 104 | 54  | 125 | 64  | 43  |
| 32  |     |     |     |     |     |     |     |     |     |

Title : Wem13M

Raw Ring-width PISY data of 127 years length

Average ring width 138.04      Sensitivity 0.48

|     |     |     |     |     |     |     |     |     |     |
|-----|-----|-----|-----|-----|-----|-----|-----|-----|-----|
| 145 | 158 | 261 | 123 | 130 | 156 | 205 | 39  | 33  | 165 |
| 82  | 100 | 97  | 115 | 46  | 22  | 41  | 34  | 23  | 118 |
| 87  | 116 | 248 | 208 | 158 | 256 | 92  | 154 | 107 | 50  |
| 67  | 58  | 87  | 116 | 116 | 23  | 21  | 20  | 20  | 24  |
| 35  | 15  | 37  | 34  | 104 | 64  | 32  | 65  | 218 | 171 |
| 116 | 108 | 135 | 95  | 33  | 22  | 32  | 29  | 23  | 64  |
| 218 | 62  | 259 | 81  | 35  | 31  | 21  | 18  | 75  | 297 |
| 367 | 198 | 105 | 213 | 123 | 187 | 429 | 386 | 395 | 154 |
| 39  | 18  | 16  | 34  | 19  | 24  | 29  | 97  | 58  | 24  |
| 19  | 36  | 36  | 82  | 333 | 204 | 283 | 400 | 219 | 191 |
| 197 | 304 | 250 | 298 | 277 | 189 | 360 | 417 | 242 | 269 |
| 169 | 398 | 247 | 199 | 103 | 157 | 170 | 228 | 123 | 224 |
| 185 | 138 | 185 | 264 | 284 | 189 | 97  |     |     |     |

Title : Wem14M

Raw Ring-width PISY data of 186 years length

Average ring width 71.58      Sensitivity 0.39

|     |     |     |     |     |     |     |     |     |     |
|-----|-----|-----|-----|-----|-----|-----|-----|-----|-----|
| 130 | 237 | 155 | 330 | 320 | 254 | 206 | 254 | 202 | 228 |
| 206 | 276 | 180 | 303 | 254 | 191 | 126 | 125 | 93  | 109 |
